# Supplementary material
Source: PubMed Central journal article supplement (PMC6371786)
Supplement: NIHMS1502570-supplement-1.pdf [file NIHMS1502570-supplement-1.pdf]

| <b>Supplemental Table 1. Full cohort summary, probands and first-degree relatives by time period and location</b>                                                                                                                                                                                                                                                                                                                               |               |       |       |               |     |               |                                       |     |               |
|-------------------------------------------------------------------------------------------------------------------------------------------------------------------------------------------------------------------------------------------------------------------------------------------------------------------------------------------------------------------------------------------------------------------------------------------------|---------------|-------|-------|---------------|-----|---------------|---------------------------------------|-----|---------------|
|                                                                                                                                                                                                                                                                                                                                                                                                                                                 | <b>Mayo 1</b> |       |       | <b>Mayo 2</b> |     |               | <b>Combined (Mayo 1 &amp; Mayo 2)</b> |     |               |
|                                                                                                                                                                                                                                                                                                                                                                                                                                                 | Other         | Other | Other | Other         | MN  | All locations | Other                                 | MN  | All locations |
| Probands                                                                                                                                                                                                                                                                                                                                                                                                                                        | 118           | 118   | 118   | 125           | 100 | 225           | 243                                   | 187 | <b>430</b>    |
| FDRs                                                                                                                                                                                                                                                                                                                                                                                                                                            | 327           | 327   | 327   | 295           | 265 | 560           | 622                                   | 557 | <b>1179</b>   |
| <p>Abbreviations: MGUS, monoclonal gammopathy of undetermined significance; MM, multiple myeloma; SMM, smoldering multiple myeloma. Values are counts. Other=Proband resided outside of Minnesota at diagnosis. MN=Proband resided in Minnesota at diagnosis. All locations=Minnesota and all other locations.</p> <p>Mayo 1=participants recruited from Vachon et al. 2009, 2005-2009.</p> <p>Mayo 2=participants recruited from 2009-2015</p> |               |       |       |               |     |               |                                       |     |               |

| <b>Supplemental Table 2. Minnesota Region: Demographic characteristics of Myeloma (MM/SMM) probands and their first degree relatives</b> |                             |                                                       |
|------------------------------------------------------------------------------------------------------------------------------------------|-----------------------------|-------------------------------------------------------|
| <b>Characteristics</b>                                                                                                                   | <b>Probands<br/>(n=187)</b> | <b>First-degree relatives of probands<br/>(n=557)</b> |
| <b>Sex</b>                                                                                                                               |                             |                                                       |
| Male                                                                                                                                     | 108 (57.8)                  | 236 (42.4)                                            |
| Female                                                                                                                                   | 79 (42.2)                   | 321 (57.6)                                            |
| <b>Age category (years)</b>                                                                                                              |                             |                                                       |
| <40                                                                                                                                      | 3 (1.6)                     | ---                                                   |
| 40-49                                                                                                                                    | 14 (7.5)                    | 126 (22.6)                                            |
| 50-59                                                                                                                                    | 51 (27.3)                   | 148 (26.6)                                            |
| 60-69                                                                                                                                    | 67 (35.8)                   | 138 (24.8)                                            |
| 70-79                                                                                                                                    | 43 (23.0)                   | 101 (18.1)                                            |
| 80+                                                                                                                                      | 9 (4.8)                     | 44 (7.9)                                              |
| <b>Relationship to proband</b>                                                                                                           |                             |                                                       |
| Parent                                                                                                                                   | -                           | 52 (9.3)                                              |
| Sibling                                                                                                                                  | -                           | 367 (65.9)                                            |
| Child                                                                                                                                    | -                           | 138 (24.8)                                            |
| Abbreviations: MM, multiple myeloma; SMM, smoldering multiple myeloma; FDRs, first degree relatives. Values reported are n (%).          |                             |                                                       |

| <b>Supplemental Table 3. Demographic characteristics of Myeloma (MM /SMM) probands and First-degree relatives (all locations)</b> |                                |                                             |                           |                                         |
|-----------------------------------------------------------------------------------------------------------------------------------|--------------------------------|---------------------------------------------|---------------------------|-----------------------------------------|
|                                                                                                                                   | <b>Mayo 1<sup>1</sup></b>      |                                             | <b>Mayo 2</b>             |                                         |
| <b>Characteristics</b>                                                                                                            | <b>Probands<br/>n=205</b>      | <b>First-degree<br/>relatives<br/>n=619</b> | <b>Probands<br/>n=225</b> | <b>First-degree relatives<br/>n=560</b> |
|                                                                                                                                   | <b>Sex</b>                     |                                             |                           |                                         |
| Male                                                                                                                              | 107 (52.2)                     | 249 (40.2)                                  | 134 (59.6)                | 238 (42.5)                              |
| Female                                                                                                                            | 98 (47.8)                      | 370 (59.8)                                  | 91 (40.4)                 | 322 (57.5)                              |
|                                                                                                                                   | <b>Age (years)</b>             |                                             |                           |                                         |
| 18-39                                                                                                                             | 6 (2.9)                        |                                             | 3 (1.3)                   |                                         |
| 40-49                                                                                                                             | 24 (11.7)                      | 202 (32.6)                                  | 16 (7.1)                  | 115 (20.5)                              |
| 50-59                                                                                                                             | 62 (30.2)                      | 132 (21.3)                                  | 73 (32.4)                 | 148 (26.4)                              |
| 60-69                                                                                                                             | 71 (34.6)                      | 139 (22.5)                                  | 79 (35.1)                 | 153 (27.3)                              |
| 70-79                                                                                                                             | 37 (18.0)                      | 89 (14.4)                                   | 47 (20.9)                 | 92 (16.4)                               |
| 80+                                                                                                                               | 5 (2.4)                        | 57 (9.2)                                    | 7 (3.1)                   | 52 (9.3)                                |
|                                                                                                                                   | <b>Relationship to proband</b> |                                             |                           |                                         |
| Parent                                                                                                                            | -                              | 87 (14.1)                                   | -                         | 52 (9.3)                                |
| Sibling                                                                                                                           | -                              | 366 (59.1)                                  | -                         | 375 (67.0)                              |
| Child                                                                                                                             | -                              | 166 (26.8)                                  | -                         | 133 (23.8)                              |

Abbreviations: MM, multiple myeloma; SMM, smoldering multiple myeloma. Values reported are n (%).  
<sup>1</sup>Samples from 2009 Cohort: Vachon CM, et al.

**Supplemental Table 4. Prevalence of MGUS in first-degree relatives of Myeloma probands (MM/SMM) compared with Olmsted County residents. (Mayo 1 compared to Mayo 2 and Olmsted County)**

|                       | Mayo 1 <sup>(1)</sup>              |                        |                     | Mayo 2                             |                        |                     | Olmsted County  |                         |                     |
|-----------------------|------------------------------------|------------------------|---------------------|------------------------------------|------------------------|---------------------|-----------------|-------------------------|---------------------|
|                       | First-degree relatives of probands |                        |                     | First-degree relatives of probands |                        |                     |                 |                         |                     |
| Age (years)           | Total (n=619)                      | Total with MGUS (n=39) | Prevalence (95% CI) | Total (n=560)                      | Total with MGUS (n=36) | Prevalence (95% CI) | Total (n=21463) | Total with MGUS (n=694) | Prevalence (95% CI) |
| 40-49                 | 202                                | 3                      | 1.5 (0.3,4.3)       | 115                                | 3                      | 2.6 (0.5,7.6)       |                 |                         |                     |
| 50-59                 | 132                                | 5                      | 3.8 (1.2,8.8)       | 148                                | 6                      | 4.1 (1.5,8.8)       | 8373            | 141                     | 1.7 (1.4,2.0)       |
| 60-69                 | 139                                | 11                     | 7.9 (4.0,14.2)      | 153                                | 10                     | 6.5 (3.1,12.0)      | 6019            | 178                     | 3.0 (2.5,3.4)       |
| 70-79                 | 89                                 | 14                     | 15.7 (8.6,26.4)     | 92                                 | 8                      | 8.7 (3.8,17.1)      | 4508            | 205                     | 4.6 (4.0,5.2)       |
| 80+                   | 57                                 | 6                      | 10.5 (3.9,22.9)     | 52                                 | 9                      | 17.3 (7.9,32.9)     | 2563            | 170                     | 6.6 (5.7,7.7)       |
| Total, adjusted (40+) | 619                                | 39                     | 6.1 (4.1,8.0)       | 560                                | 36                     | 5.8 (3.7,7.8)       |                 |                         |                     |
| Total, adjusted (50+) | 417                                | 36                     | 8.5 (5.7,11.4)      | 445                                | 33                     | 7.3 (4.7,9.8)       | 21463           | 694                     | 3.2 (3.0,3.5)       |

Abbreviations: MGUS, monoclonal gammopathy of undetermined significance; MM, multiple myeloma; SMM, smoldering multiple myeloma; 95% CI, 95% confidence interval. Rates for MGUS determined by serum protein electrophoresis with immunofixation for confirmation.

Adjusted=Age and sex adjusted to 2000 US total population.

<sup>1</sup>Samples from 2009 Cohort: Vachon CM, et al.

**Supplemental Table 5. Minnesota Region: Prevalence of MGUS in first-degree relatives of Myeloma (MM / SMM) probands compared with Olmsted County residents**

| Age (years)                               | First-degree relatives of probands |                           |                        | Olmsted County     |                            |                        |
|-------------------------------------------|------------------------------------|---------------------------|------------------------|--------------------|----------------------------|------------------------|
|                                           | Total<br>(n=557)                   | Total with MGUS<br>(n=43) | Prevalence<br>(95% CI) | Total<br>(n=21463) | Total with MGUS<br>(n=694) | Prevalence<br>(95% CI) |
| <b>40-49</b>                              | 126 (22.6)                         | 1 (2.3)                   | 0.8 (0.0,4.4)          | -                  | -                          | -                      |
| <b>50-59</b>                              | 148 (26.6)                         | 6 (14.0)                  | 4.1 (1.5,8.8)          | 8373 (39.0)        | 141 (20.3)                 | 1.7 (1.4,2.0)          |
| <b>60-69</b>                              | 138 (24.8)                         | 13 (30.2)                 | 9.4 (5.0,16.1)         | 6019 (28.0)        | 178 (25.6)                 | 3.0 (2.5,3.4)          |
| <b>70-79</b>                              | 101 (18.1)                         | 16 (37.2)                 | 15.8 (9.1,25.7)        | 4508 (21.0)        | 205 (29.5)                 | 4.6 (4.0,5.2)          |
| <b>80+</b>                                | 44 (7.9)                           | 7 (16.2)                  | 15.9 (6.4,32.8)        | 2563 (11.9)        | 170 (24.5)                 | 6.6 (5.7,7.7)          |
| <b>Total,<br/>adjusted<br/>(Ages 40+)</b> | 557 (100)                          | 43 (100)                  | 6.6 (4.5,8.6)          | -                  | -                          | -                      |
| <b>Total,<br/>adjusted<br/>(Ages 50+)</b> | 431 (77.4)                         | 42 (97.7)                 | 9.6 (6.6,12.5)         | 21463 (100)        | 694 (100)                  | 3.2 (3.0,3.5)          |

Abbreviations: MGUS, monoclonal gammopathy of undetermined significance; MM, multiple myeloma; SMM, smoldering multiple myeloma; 95% CI, 95% confidence interval. Values reported are n (%). Rates for MGUS determined by serum protein electrophoresis with immunofixation for confirmation. Adjusted=age and sex adjusted to 2000 US total population.
